# Supplementary material
Source: PubMed Central journal article supplement (PMC6440700)
Supplement: NIHMS1008805-supplement-3.pdf [file NIHMS1008805-supplement-3.pdf]

**Supplementary Figure 1. Piericidin A and HORMAD1 association identified by NPF screen.** (A) Heat map of the top 609 (out of 17,432) most selective (indicated by activity score) natural product fraction/dose combinations in 26 cell lines. (B) Heat map of 63 natural product/dose combinations that exhibited most selectivity (indicated by activity score) at lowest doses and also displayed favorable LC-MS profiles. (C) Heat map of selectivity (activity score) of natural product fraction SNB-051-14 in a panel of 26 cell lines. (D) LC-MS chromatograph of natural product subfraction SNB-051-F36. Seven individual peaks were collected at 254 nM absorption over 20 min. (E) Left: <sup>1</sup>H NMR analysis identifies piericidin A as the major metabolite for enriched natural product subfraction SNB-051-F36-H7. Right: chemical structure of piericidin A. (F) Expression profile for HORMAD1 gene expression across panel of tissues indicated (data accessed from GTEx Portal). (G) Whole cell lysates immunoblotted with indicated antibodies.

A.

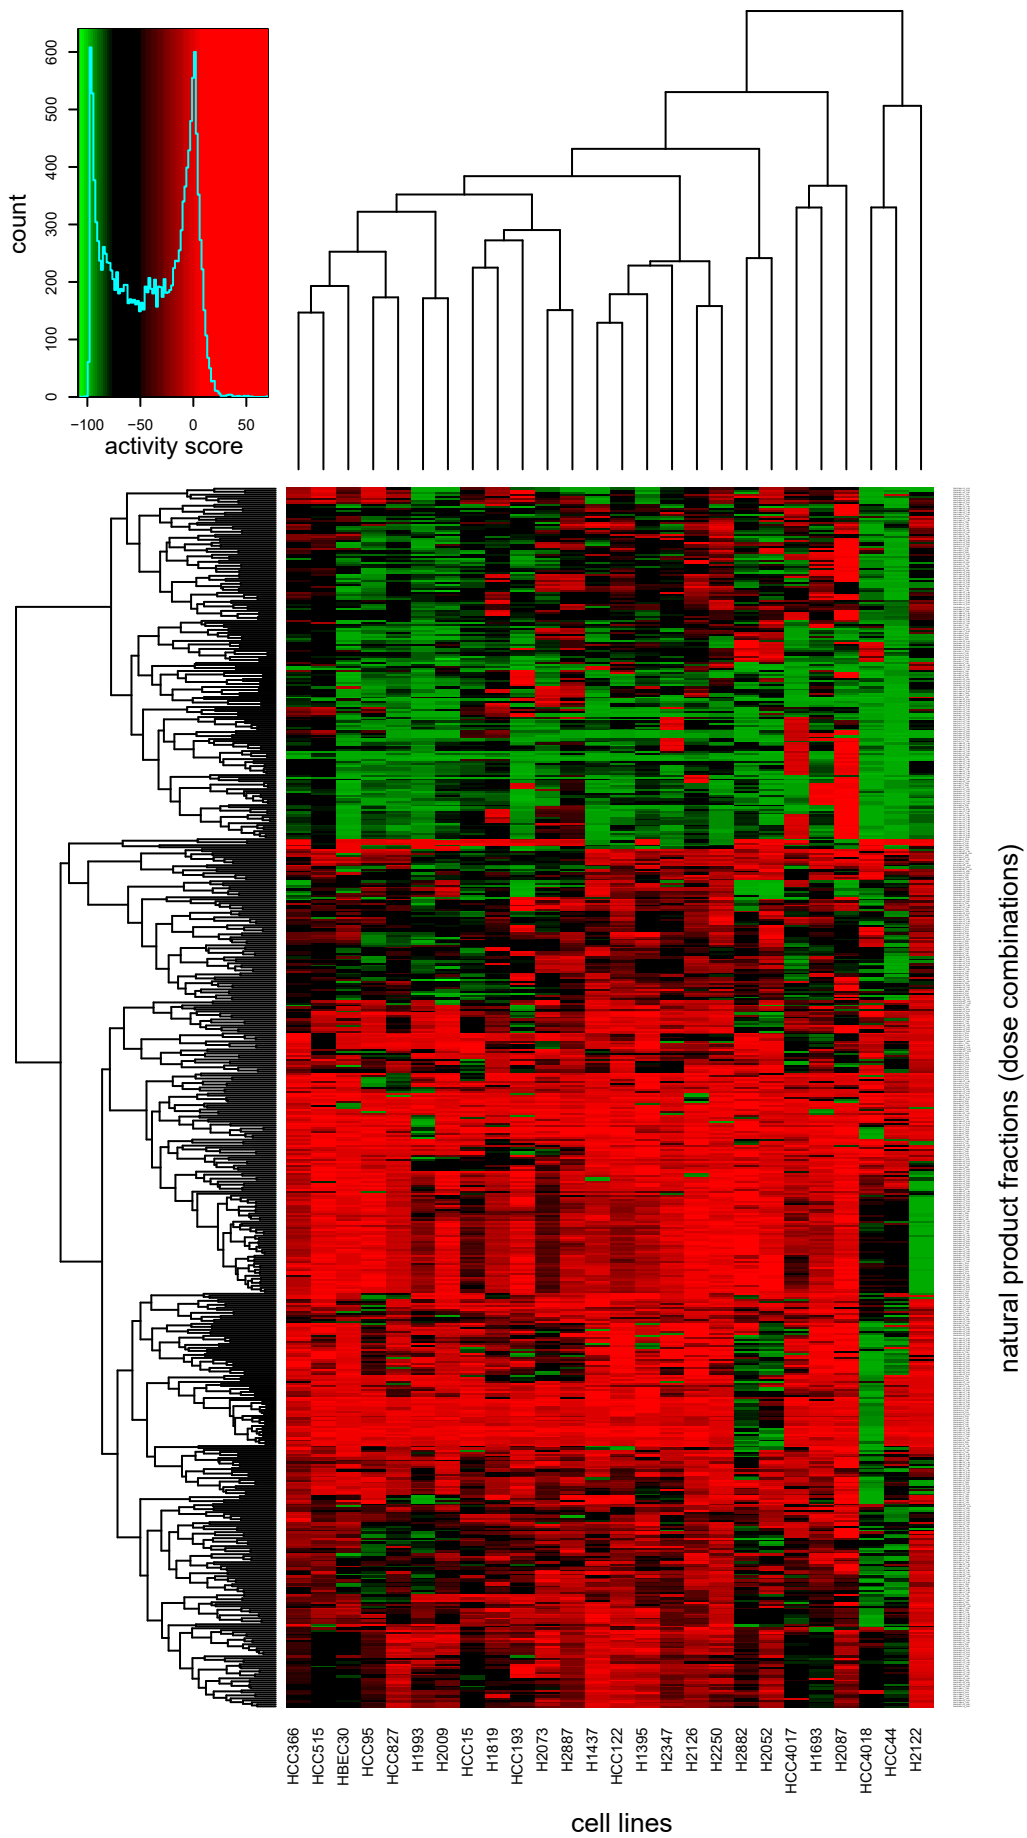

B.

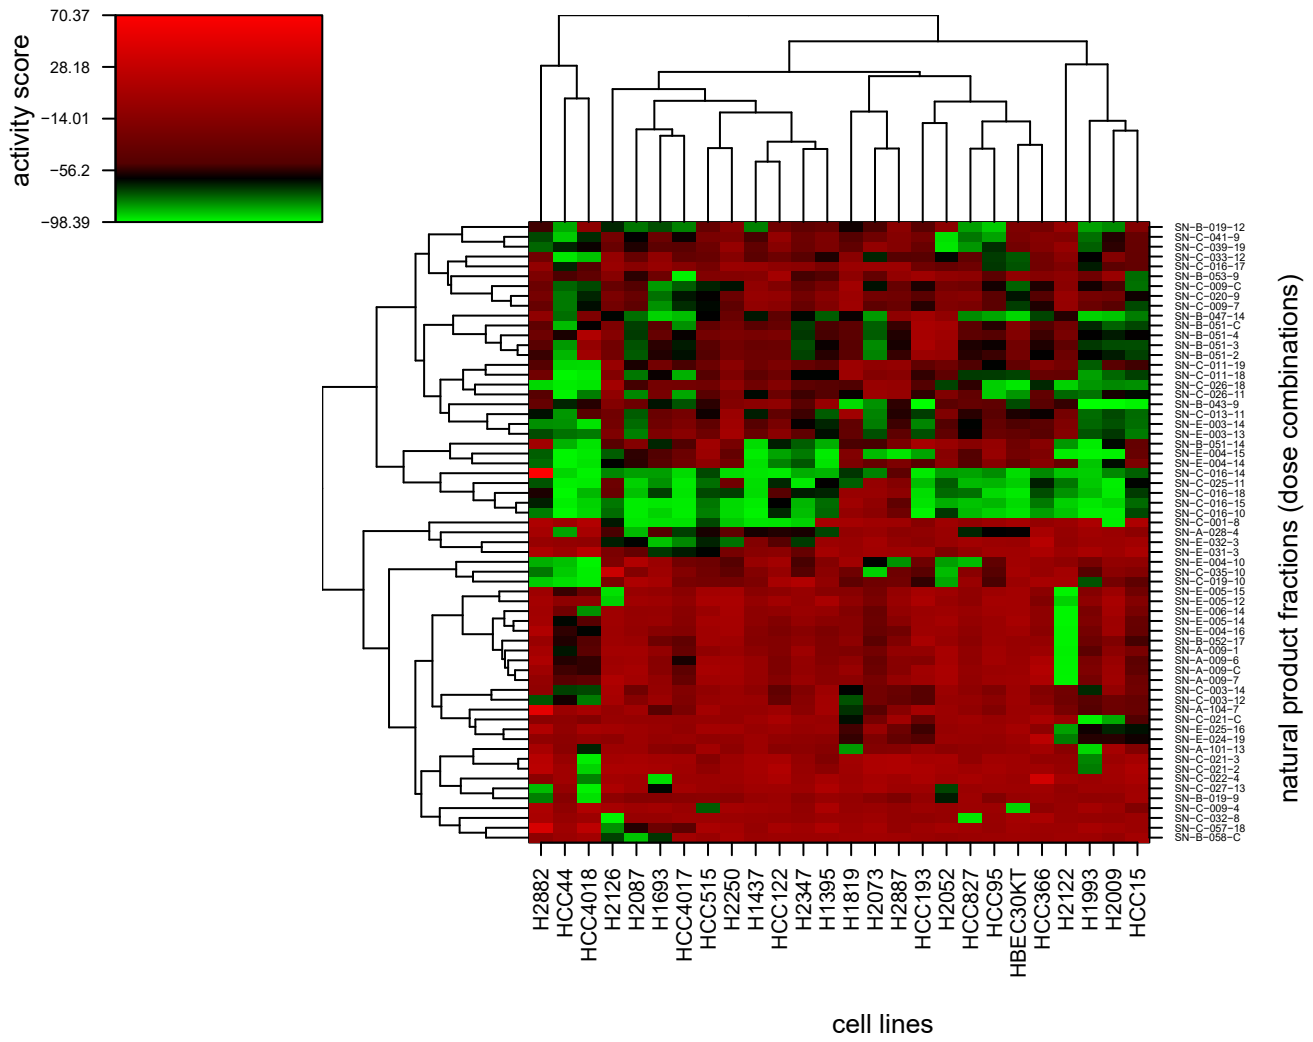

C.

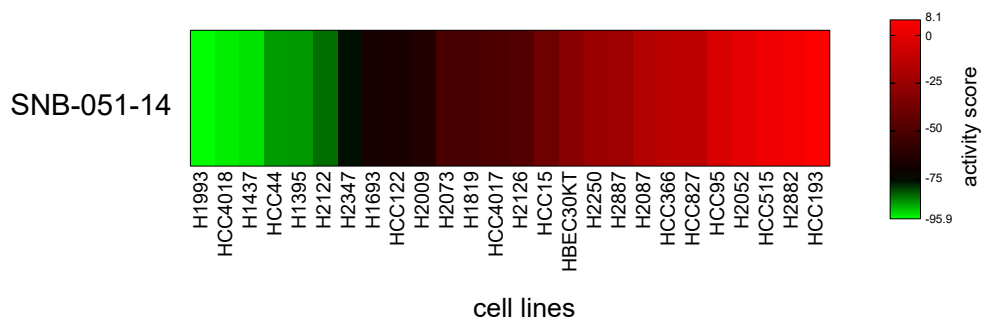

D.

SNB-051-F36

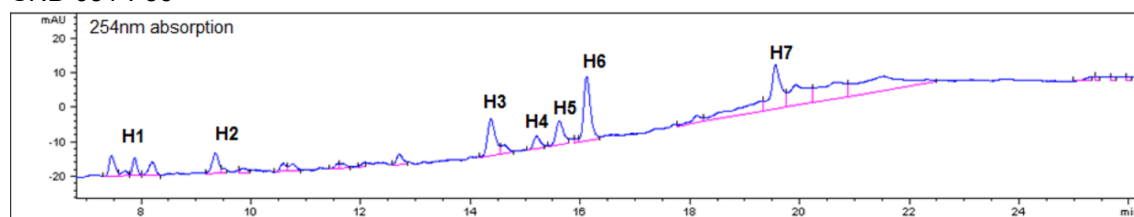

E.

| No. | $\delta_H$ , mult. (J in Hz)<br>piericidin A (4.1) | No. | $\delta_H$ , mult. (J in Hz)<br>piericidin A (4.1) |
|-----|----------------------------------------------------|-----|----------------------------------------------------|
| 1   | 3.34 d (6.9)                                       | 1'  | -                                                  |
| 2   | 5.43 dd (13.0, 6.9)                                | 2'  | -                                                  |
| 3   | -                                                  | 3'  | -                                                  |
| 4   | 2.76 d (6.9)                                       | 4'  | -                                                  |
| 5   | 5.52 dt (15.5, 6.9)                                | 5'  | -                                                  |
| 6   | 6.07 d (15.5)                                      | 6'  | 2.03 s                                             |
| 7   | -                                                  | 7'  | 3.73 s                                             |
| 8   | 5.27 d (9.5)                                       | 8'  | 3.89 s                                             |
| 9   | 2.66 m                                             |     |                                                    |
| 10  | 3.68 d (8.3)                                       |     |                                                    |
| 11  | -                                                  |     |                                                    |
| 12  | 5.30 m                                             |     |                                                    |
| 13  | 1.61 d (7.5)                                       |     |                                                    |
| 14  | 1.73 s                                             |     |                                                    |
| 15  | 1.73 s                                             |     |                                                    |
| 16  | 0.79 d (6.9)                                       |     |                                                    |
| 17  | 1.59 s                                             |     |                                                    |

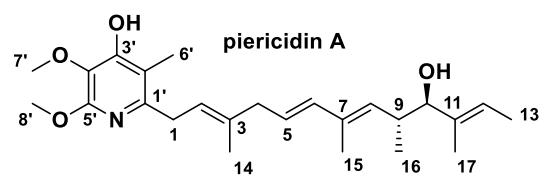

F.

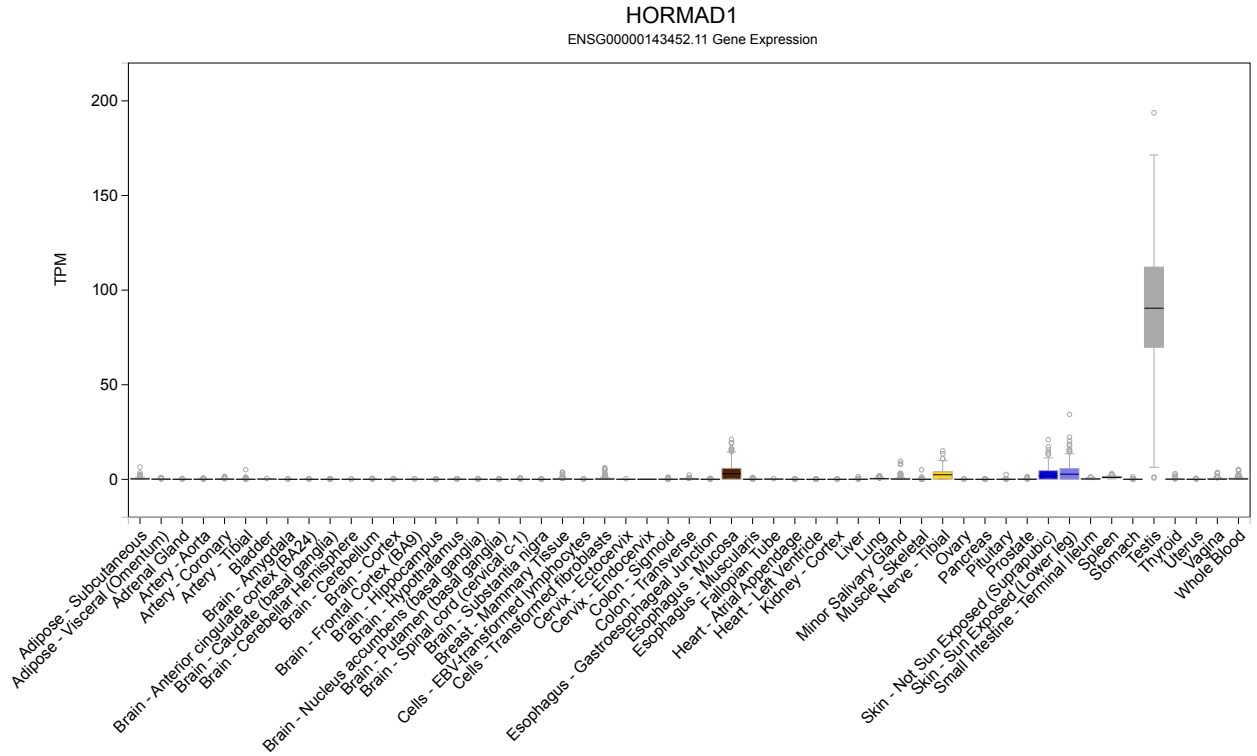

G.

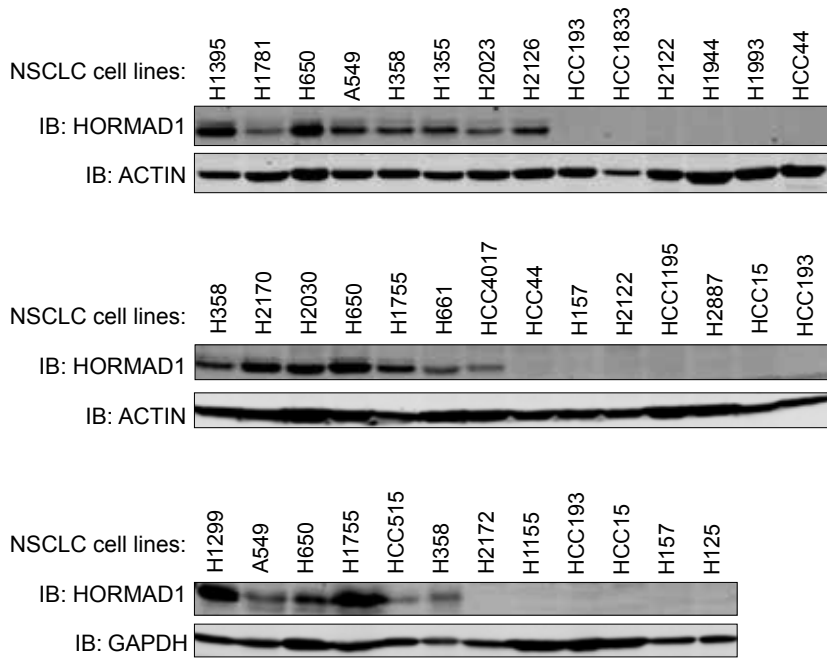

**Supplementary Figure 2. Piericidin A induces DNA damage in NSCLC lines.** (A) HCC44 and Calu.6 cells were exposed to piericidin A (PA) (1  $\mu$ M) for 48 h, then fixed and immunostained with 53BP1 antibody. Dots indicate individual cells, >100 cells quantified for each condition, and bar represents the mean. P-values calculated by Mann-Whitney test. (B) H157 cells lentivirally infected with HORMAD1 or control vector were exposed to escalating doses of piericidin A for 72 hours (h). Points indicate viability as measured by Cell-Titer Glo® (n=3) and bars indicate standard deviation (sd). Curves are non-linear fits to the respective data. Whole cell lysates were immunoblotted with indicated antibodies. (C) Indicated cell lines expressing shHORMAD1 and shSCRBL were exposed to escalating doses of piericidin A for 72 h. Points indicate viability as measured by Cell-Titer Glo® (n=3) and bars indicate sd. Curves are non-linear fits to the respective data. Whole cell lysates were immunoblotted with indicated antibodies. (D) Indicated cell lines expressing Cas9 and sgCTRL or sgHORMAD1 were exposed to escalating doses of piericidin A for 72 h. Points indicate viability as measured by Cell-Titer Glo® (n=3) and bars indicate sd. Curves are non-linear fits to the respective data. Whole cell lysates were immunoblotted with indicated antibodies.

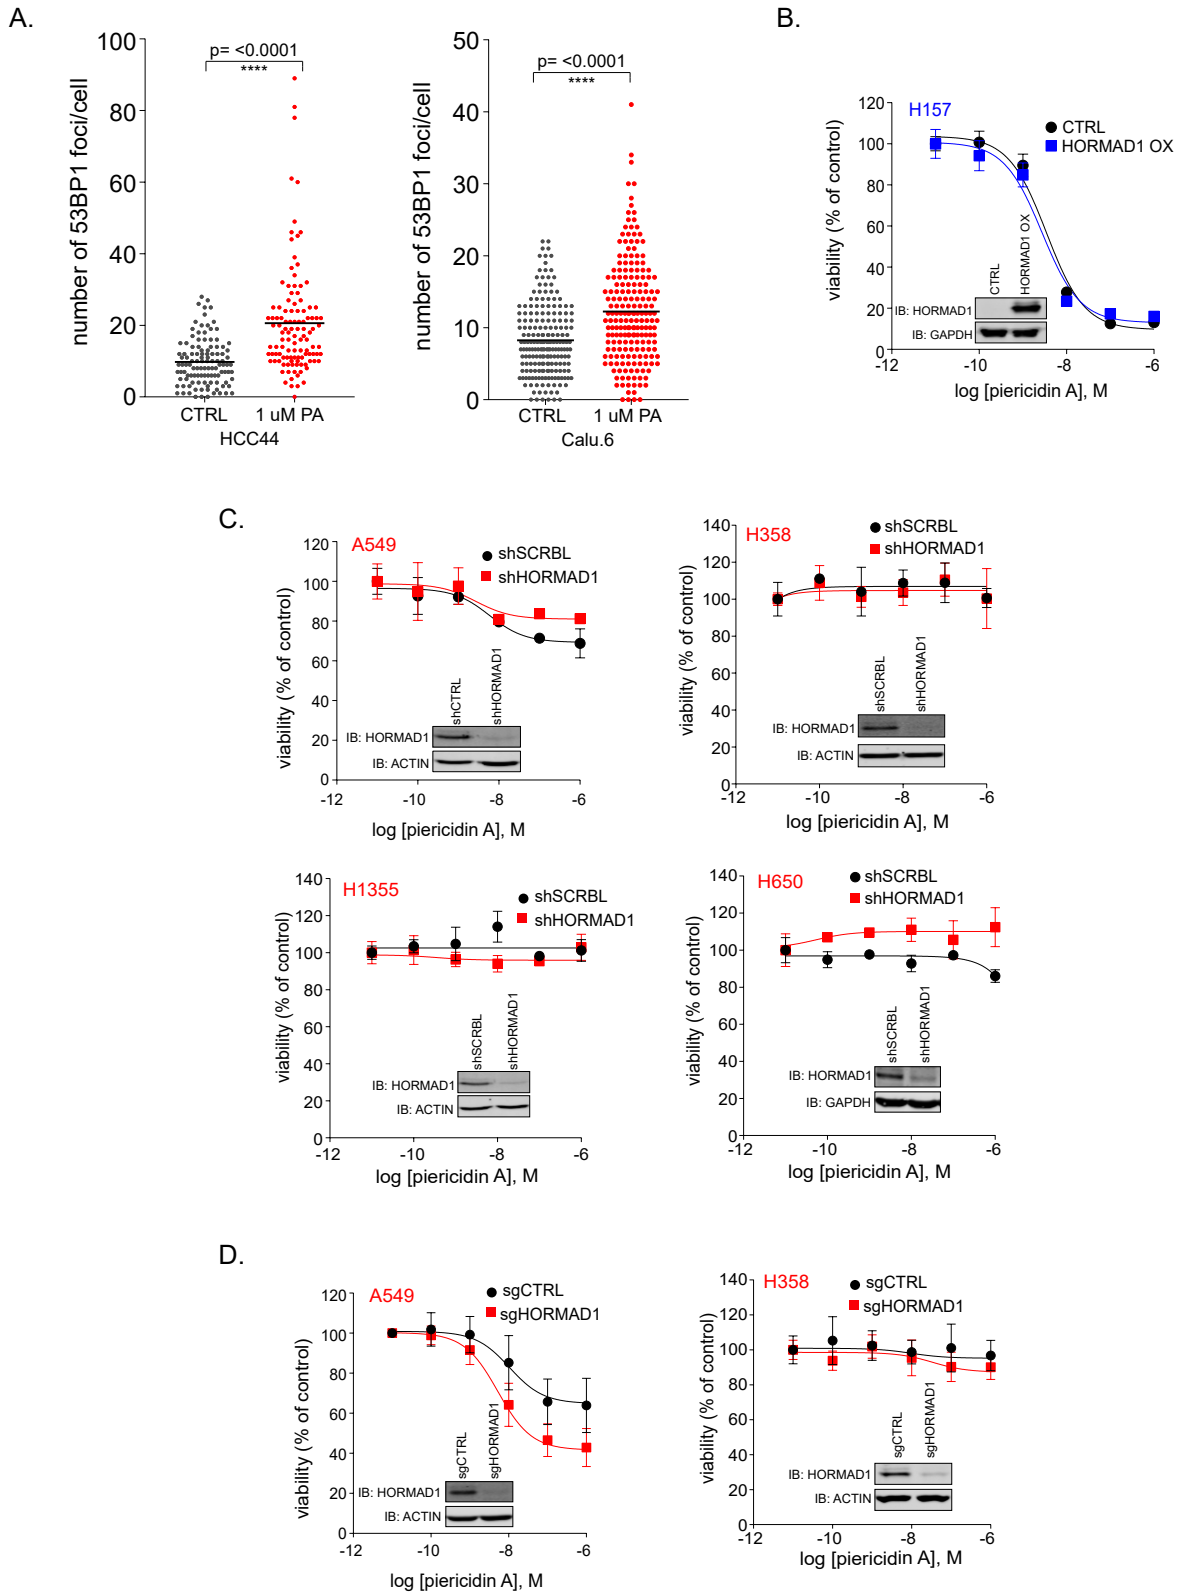

**Supplementary Figure 3. S2N and geneset overlaps for HORMAD1 high LUAD tumors.**

(A) Descriptions of overlapping genes between top 10% of genes upregulated in HORMAD1 high tumors by Signal-2-Noise analysis (251 genes) and Hallmark Gene Sets (Molecular Signatures Database). (B) Descriptions of overlapping genes between top 10% of genes upregulated in HORMAD1 high tumors by Signal-2-Noise analysis (251 genes) and KEGG gene sets (Molecular Signatures Database).



A.

Hallmark Genes Sets and Associated Statistical Values

| Gene Set Name [# Genes]               | Description                                                                               | # Genes in Overlap | p-value   | FDR q-value | Genes                                                                                                                                                                                                                                                                                                                                                                      |
|---------------------------------------|-------------------------------------------------------------------------------------------|--------------------|-----------|-------------|----------------------------------------------------------------------------------------------------------------------------------------------------------------------------------------------------------------------------------------------------------------------------------------------------------------------------------------------------------------------------|
| HALLMARK_E2F_TARGETS [200]            | Genes encoding cell cycle related targets of E2F transcription factors.                   | 51                 | 1.14 e-72 | 2.86 e-71   | AURKA, KIF2C, CCNB2, TOP2A, PLK1, CENPE, KIF4A, RACGAP1, BIRC5, BRCA2, ESPL1, CDKN3, CDC20, PLK4, MCM2, CDC25A, KPN2A, CKS1B, CHEK1, ORC6, UBE2S, MKI67, MYBL2, AURKB, DLGAP5, MCM4, RFC3, CCNE1, DEPDC1, BRCA1, SPAG5, RAD51AP1, CHEK2, KIF18B, SPC24, ATAD2, UBE2T, PSMC3IP, HELLS, CDCA8, SPC25, BUB1B, TK1, DSCC1, DIAPH3, CDCA3, GINS4, TIMELESS, TRIP13, MELK, GINS1 |
| HALLMARK_G2M_CHECKPOINT [200]         | Genes involved in the G2/M checkpoint, as in progression through the cell division cycle. | 51                 | 1.14 e-72 | 2.86 e-71   | AURKA, KIF2C, CCNB2, TOP2A, PLK1, CENPE, KIF4A, RACGAP1, BIRC5, BRCA2, ESPL1, CDKN3, CDC20, PLK4, MCM2, CDC25A, KPN2A, CKS1B, CHEK1, ORC6, UBE2S, MKI67, MYBL2, AURKB, BUB1, NEK2, TTK, NDC80, CENPF, TPX2, FBXO5, KIF11, NUSAP1, KIF15, KIF23, DBF4, CDC6, STIL, CCNF, CDC45, CENPA, E2F1, E2F2, TROAP, TRAP1, POLQ, UBE2C, CASC5, RBL1, RAD54L, EXO1                     |
| HALLMARK_MITOTIC_SPINDLE [200]        | Genes important for mitotic spindle assembly.                                             | 26                 | 5.74 e-29 | 9.56 e-28   | AURKA, KIF2C, CCNB2, TOP2A, PLK1, CENPE, KIF4A, RACGAP1, BIRC5, BRCA2, ESPL1, DLGAP5, BUB1, NEK2, TTK, NDC80, CENPF, TPX2, FBXO5, KIF11, NUSAP1, KIF15, KIF23, SASS6, ANLN, KNTC1                                                                                                                                                                                          |
| HALLMARK_SPERMATOGENESIS [135]        | Genes up-regulated during production of male gametes (sperm), as in spermatogenesis.      | 12                 | 5.24 e-12 | 6.55 e-11   | AURKA, KIF2C, CCNB2, CDKN3, BUB1, NEK2, TTK, DBF4, YBX2, RPL39L, NCAPI, ACRV1                                                                                                                                                                                                                                                                                              |
| HALLMARK_ESTROGEN_RESPONSE_LATE [200] | Genes defining late response to estrogen.                                                 | 7                  | 7.44 e-5  | 6.2 e-4     | TOP2A, CDC20, PLK4, CDC6, STIL, MEST, PLAC1                                                                                                                                                                                                                                                                                                                                |
| HALLMARK_MTORC1_SIGNALING [200]       | Genes up-regulated through activation of mTORC1 complex.                                  | 7                  | 7.44 e-5  | 6.2 e-4     | AURKA, PLK1, MCM2, CDC25A, MCM4, BUB1, CCNF                                                                                                                                                                                                                                                                                                                                |
| HALLMARK_MYC_TARGETS_V1 [200]         | A subgroup of genes regulated by MYC - version 1 (v1).                                    | 6                  | 5.54 e-4  | 3.96 e-3    | CDC20, MCM2, KPN2A, MCM4, CDC45, TYMS                                                                                                                                                                                                                                                                                                                                      |
| HALLMARK_MYC_TARGETS_V2 [58]          | A subgroup of genes regulated by MYC - version 2 (v2).                                    | 3                  | 3.16 e-3  | 1.97 e-2    | PLK1, PLK4, MCM4                                                                                                                                                                                                                                                                                                                                                           |
| HALLMARK_DNA_REPAIR [150]             | Genes involved in DNA repair.                                                             | 4                  | 7.12 e-3  | 3.95 e-2    | RFC3, TYMS, ZWINT, RAD51                                                                                                                                                                                                                                                                                                                                                   |

B.

KEGG Genes Sets and Associated Statistical Values

| Gene Set Name [# Genes]                            | Description                             | # Genes in Overlap | p-value   | FDR q-value | Genes                                                                                                                                                               |
|----------------------------------------------------|-----------------------------------------|--------------------|-----------|-------------|---------------------------------------------------------------------------------------------------------------------------------------------------------------------|
| KEGG_CELL_CYCLE [128]                              | Cell cycle                              | 25                 | 1.43 e-32 | 2.66 e-30   | CCNB1, CCNB2, CCNE1, CCNE2, PLK1, BUB1, PKMYT1, CDC25C, CDC20, ESPL1, CHEK1, CHEK2, CDC25A, MCM2, MCM4, E2F1, E2F2, RBL1, DBF4, ORC6, ORC1, BUB1B, TTK, CDC45, CDC6 |
| KEGG_OOCYTE_MEIOSIS [114]                          | Oocyte meiosis                          | 13                 | 2.58 e-14 | 2.4 e-12    | CCNB1, CCNB2, CCNE1, CCNE2, PLK1, BUB1, PKMYT1, CDC25C, CDC20, ESPL1, SGOL1, FBXO5, AURKA                                                                           |
| KEGG_HOMOLOGOUS_RECOMBINATION [28]                 | Homologous recombination                | 7                  | 8.01 e-11 | 4.97 e-9    | RAD51, BRCA2, EME1, RAD54B, BLM, XRCC2, RAD54L                                                                                                                      |
| KEGG_P53_SIGNALING_PATHWAY [69]                    | p53 signaling pathway                   | 7                  | 6.13 e-8  | 2.85 e-6    | CCNB1, CCNB2, CCNE1, CCNE2, CHEK1, CHEK2, GTSE1                                                                                                                     |
| KEGG_PROGESTERONE_MEDIATED_OOCYTE_MATURATION [86]  | Progesterone-mediated oocyte maturation | 7                  | 2.84 e-7  | 1.06 e-5    | CCNB1, CCNB2, PLK1, BUB1, PKMYT1, CDC25C, CDC25A                                                                                                                    |
| KEGG_DNA_REPLICATION [36]                          | DNA replication                         | 5                  | 1.02 e-6  | 3.16 e-5    | MCM2, MCM4, RFC3, POLE2, DNA2                                                                                                                                       |
| KEGG_PANCREATIC_CANCER [70]                        | Pancreatic cancer                       | 5                  | 2.85 e-5  | 7.57 e-4    | E2F1, E2F2, RAD51, BRCA2, RAC3                                                                                                                                      |
| KEGG_PATHWAYS_IN_CANCER [328]                      | Pathways in cancer                      | 9                  | 4.76 e-5  | 1.11 e-3    | CCNE1, CCNE2, E2F1, E2F2, RAD51, BRCA2, RAC3, CKS1B, BIRC5                                                                                                          |
| KEGG_SMALL_CELL_LUNG_CANCER [84]                   | Small cell lung cancer                  | 5                  | 6.87 e-5  | 1.42 e-3    | CCNE1, CCNE2, E2F1, E2F2, CKS1B                                                                                                                                     |
| KEGG_PROSTATE_CANCER [89]                          | Prostate cancer                         | 4                  | 1.09 e-3  | 2.02 e-2    | CCNE1, CCNE2, E2F1, E2F2                                                                                                                                            |
| KEGG_NEUROACTIVE_LIGAND_RECEPTOR_INTERACTION [272] | Neuroactive ligand-receptor interaction | 6                  | 2.66 e-3  | 4.49 e-2    | CHRM5, GRIN2D, HTR2C, GPR83, GABRR1, MCHR2                                                                                                                          |
